# Supplementary material
Source: PubMed Central journal article supplement (PMC7606644)
Supplement: NIHMS1613056-supplement-1.pdf [file NIHMS1613056-supplement-1.pdf]

## **Appendix**

### Supplemental Tables

Table 1: Spearman correlations of urinary markers, urine creatinine, and eGFR

Table 2: Associations of urinary biomarker-creatinine ratios with annualized eGFR change among SPRINT participants with CKD

Table 3: Associations of urinary biomarker-creatinine ratios with 50% eGFR decline or ESKD requiring dialysis or transplant among SPRINT participants with CKD

**Supplemental Table 1. Spearman correlations of urinary biomarkers, urine creatinine, and eGFR**

|                  | eGFR | Uromodulin | $\beta$ 2m | $\alpha$ 1m | Urine creatinine | Urine albumin |
|------------------|------|------------|------------|-------------|------------------|---------------|
| eGFR             | ---  | 0.345*     | -0.132*    | -0.222*     | 0.143*           | -0.233*       |
| Uromodulin       |      | ---        | 0.033      | 0.101*      | 0.482*           | 0.008         |
| $\beta$ 2m       |      |            | ---        | 0.498*      | 0.003            | 0.273*        |
| $\alpha$ 1m      |      |            |            | ---         | 0.390*           | 0.519*        |
| Urine creatinine |      |            |            |             | ---              | 0.295*        |
| Urine albumin    |      |            |            |             |                  | ---           |

\*p<0.01

Abbreviations: eGFR, estimated glomerular filtration rate by combined CKD-EPI equation for serum creatinine and cystatin C;  $\beta$ 2m,  $\beta$ 2-microglobulin;  $\alpha$ 1m,  $\alpha$ 1-microglobulin.

**Supplemental Table 2. Associations of urinary biomarker-creatinine ratios with annualized eGFR change among SPRINT participants with CKD (N = 2,428)**

|                                                           | Standard BP arm<br>N = 1186         | Intensive BP arm<br>N = 1242        | P-value<br>for<br>interaction |
|-----------------------------------------------------------|-------------------------------------|-------------------------------------|-------------------------------|
|                                                           | % annual eGFR<br>change<br>(95% CI) | % annual eGFR<br>change<br>(95% CI) |                               |
| <b>Urine uromodulin/cr (per 2-fold higher)</b>            |                                     |                                     |                               |
| Model 1 <sup>a</sup>                                      | 0.28 (0.03, 0.54)                   | 0.24 (0.01, 0.47)                   | 0.079                         |
| Model 2 <sup>b</sup>                                      | 0.20 (-0.06, 0.45)                  | 0.03 (-0.22, 0.27)                  | 0.001                         |
| Model 3 <sup>c</sup>                                      | 0.26 (0.01, 0.51)                   | 0.06 (-0.19, 0.30)                  | 0.001                         |
| <b>Urine <math>\beta</math>2m/cr (per 2-fold higher)</b>  |                                     |                                     |                               |
| Model 1 <sup>a</sup>                                      | -0.33 (-0.42, -0.26)                | -0.14 (-0.22, -0.07)                | <0.001                        |
| Model 2 <sup>b</sup>                                      | -0.20 (-0.27, -0.12)                | -0.08 (-0.16, -0.001)               | 0.007                         |
| Model 3 <sup>c</sup>                                      | -0.08 (-0.16, -0.01)                | -0.01 (-0.08, 0.08)                 | 0.003                         |
| <b>Urine <math>\alpha</math>1m/cr (per 2-fold higher)</b> |                                     |                                     |                               |
| Model 1 <sup>a</sup>                                      | -1.09 (-1.27, -0.92)                | -0.59 (-0.78, -0.41)                | <0.001                        |
| Model 2 <sup>b</sup>                                      | -0.57 (-0.77, -0.38)                | -0.31 (-0.52, -0.11)                | <0.001                        |
| Model 3 <sup>c</sup>                                      | 0.02 (-0.19, 0.23)                  | 0.01 (-0.22, 0.23)                  | 0.001                         |

Abbreviations:  $\alpha$ 1m/cr,  $\alpha$ 1-microglobulin/creatinine ratio;  $\beta$ 2m/cr,  $\beta$ 2-microglobulin/creatinine ratio; BP, blood pressure; CKD, chronic kidney disease; eGFR, estimated glomerular filtration rate; uromodulin/cr, uromodulin/creatinine ratio.

<sup>a</sup>Adjusted for age, sex, race, and urine creatinine.

<sup>b</sup>Adjusted for Model 1 covariates and baseline eGFR, smoking status, history of cardiovascular disease, baseline number of antihypertensive medications, systolic blood pressure, diastolic blood pressure, body mass index, high-density lipoprotein, and total cholesterol.

<sup>c</sup>Adjusted for Model 2 covariates and urine albumin.

**Supplemental Table 3. Associations of urinary biomarker-creatinine ratios with 50% eGFR decline or ESKD requiring dialysis or transplant among SPRINT participants with CKD (N = 2,428)**

|                                                           | Standard BP arm<br>N = 30 events | Intensive BP arm<br>N = 57 events | P-value<br>for<br>interaction |
|-----------------------------------------------------------|----------------------------------|-----------------------------------|-------------------------------|
|                                                           | Hazard Ratio<br>(95% CI)         | Hazard Ratio<br>(95% CI)          |                               |
| <b>Urine uromodulin/cr (per 2-fold higher)</b>            |                                  |                                   |                               |
| Model 1 <sup>a</sup>                                      | 0.71 (0.49, 1.02)                | 0.79 (0.61, 1.03)                 | 0.166                         |
| Model 2 <sup>b</sup>                                      | 0.93 (0.65, 1.37)                | 0.96 (0.74, 1.25)                 | 0.032                         |
| Model 3 <sup>c</sup>                                      | 0.85 (0.57, 1.27)                | 0.94 (0.72, 1.23)                 | 0.015                         |
| <b>Urine <math>\beta</math>2m/cr (per 2-fold higher)</b>  |                                  |                                   |                               |
| Model 1 <sup>a</sup>                                      | 1.33 (1.10, 1.59)                | 1.08 (0.97, 1.20)                 | 0.055                         |
| Model 2 <sup>b</sup>                                      | 1.06 (0.89, 1.27)                | 1.04 (0.95, 1.15)                 | 0.206                         |
| Model 3 <sup>c</sup>                                      | 1.03 (0.86, 1.23)                | 1.01 (0.92, 1.11)                 | 0.221                         |
| <b>Urine <math>\alpha</math>1m/cr (per 2-fold higher)</b> |                                  |                                   |                               |
| Model 1 <sup>a</sup>                                      | 2.82 (2.07, 3.84)                | 1.49 (1.18, 1.89)                 | 0.001                         |
| Model 2 <sup>b</sup>                                      | 1.66 (1.14, 2.41)                | 1.23 (0.93, 1.63)                 | 0.003                         |
| Model 3 <sup>c</sup>                                      | 1.44 (0.95, 2.18)                | 1.03 (0.78, 1.38)                 | 0.003                         |

Abbreviations:  $\alpha$ 1m/cr,  $\alpha$ 1-microglobulin/creatinine ratio;  $\beta$ 2m/cr,  $\beta$ 2-microglobulin/creatinine ratio; BP, blood pressure; CKD, chronic kidney disease; eGFR, estimated glomerular filtration rate; ESKD, end-stage kidney disease; HR, hazard ratio; uromodulin/cr, uromodulin/creatinine ratio.

<sup>a</sup>Adjusted for age, sex, race, and urine creatinine.

<sup>b</sup>Adjusted for Model 1 covariates and baseline eGFR, smoking status, history of cardiovascular disease, baseline number of antihypertensive medications, systolic blood pressure, diastolic blood pressure, body mass index, high-density lipoprotein, and total cholesterol.

<sup>c</sup>Adjusted for Model 2 covariates and urine albumin.
